# Supplementary material
Source: PubMed Central journal article supplement (PMC5510050)
Supplement: Supp_Fig1.pdf [file Supp_Fig1.pdf]

# Supplementary Data

## Parametric Analyses

### Middle Frontal Gyrus (MFG)

### L. Posterior Insula

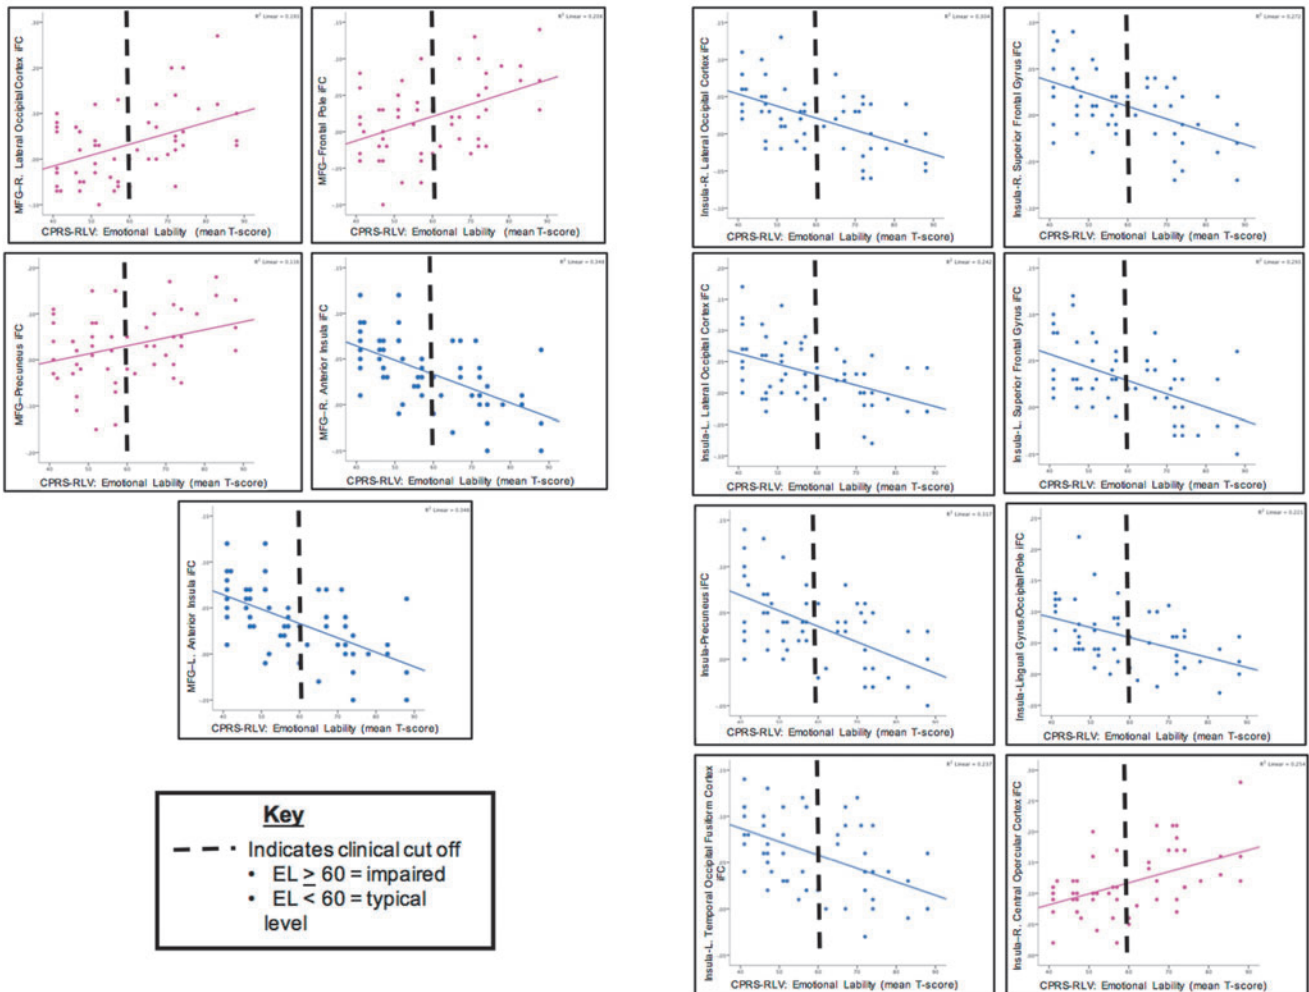

**SUPPLEMENTARY FIG. S1.** Scatterplots show the relations between EL ratings and iFC between MFG and PI and each of the cluster emerging from parametric analyses. EL, emotional lability; iFC, intrinsic functional connectivity; MFG, middle frontal gyrus; PI, posterior insula.
