# Supplementary material
Source: PubMed Central journal article supplement (PMC5510050)
Supplement: Supp_Fig2.pdf [file Supp_Fig2.pdf]

## Non-Parametric Analyses

### Middle Frontal Gyrus (MFG)

### L. Posterior Insula

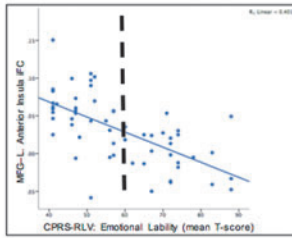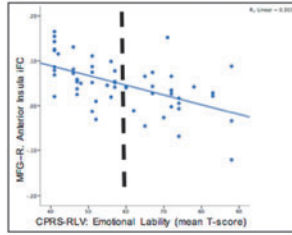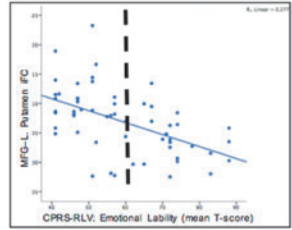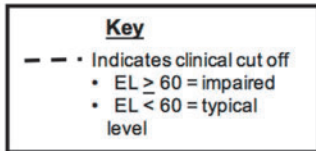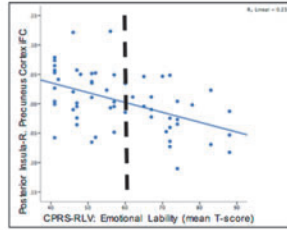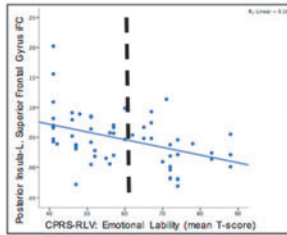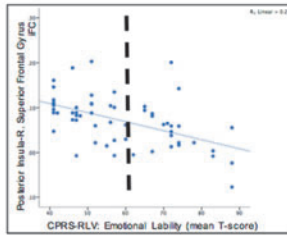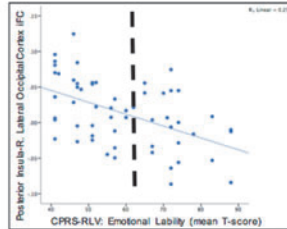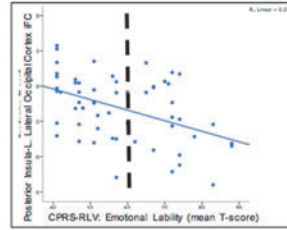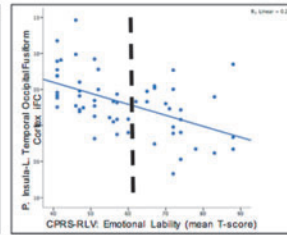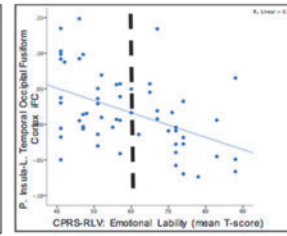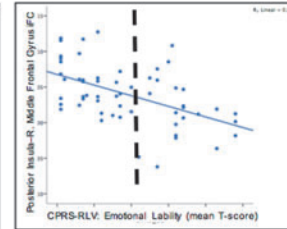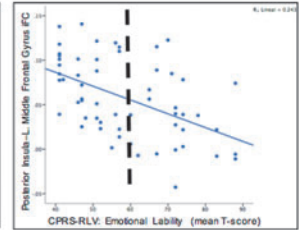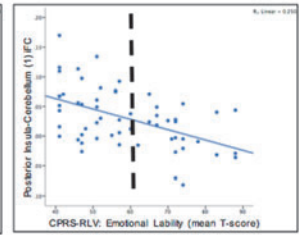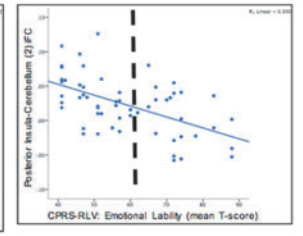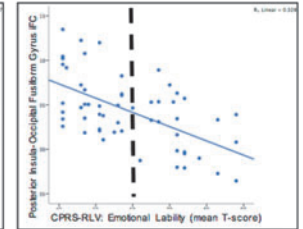

**SUPPLEMENTARY FIG. S2.** Scatterplots show the relations between EL ratings and iFC between MFG and PI and each of the cluster emerging from nonparametric analyses.
