# Supplementary material
Source: PubMed Central journal article supplement (PMC5510050)
Supplement: Supp_Fig3.pdf [file Supp_Fig3.pdf]

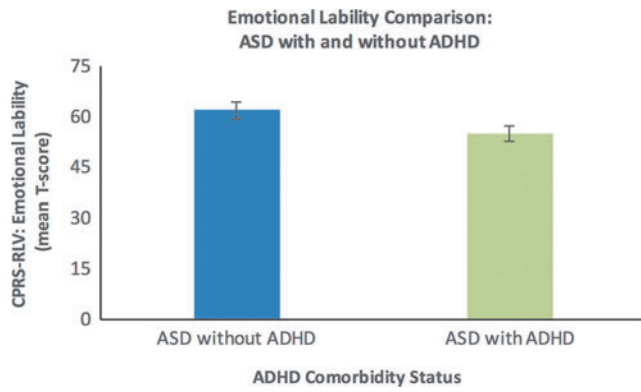

**SUPPLEMENTARY FIG. S3.** Group mean EL scores (CPRS-RLV; *T*-score) do not differ between children with ASD with comorbid ADHD and those without comorbid ADHD. ADHD, attention-deficit/hyperactivity disorder; ASD, autism spectrum disorder; CPRS-RLV, Conners Parent Rating Scale- Revised-Long Version.
