# Supplementary material
Source: PubMed Central journal article supplement (PMC5510050)
Supplement: Supp_Fig4.pdf [file Supp_Fig4.pdf]

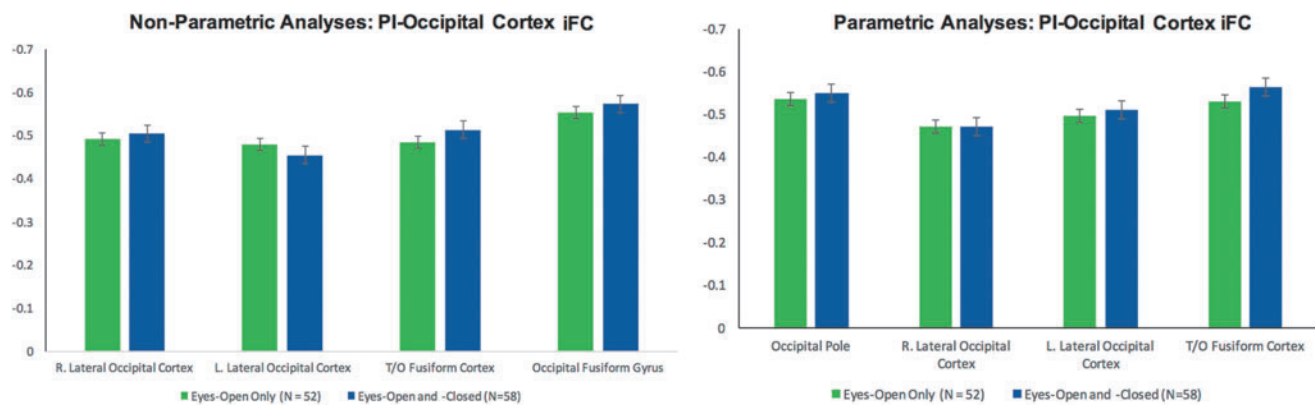

**SUPPLEMENTARY FIG. S4.** Histograms depicting the correlational value ( $r$ ) of PI-iFC to clusters in visual cortex across all participants ( $N=58$ ; dark blue) and in those who kept their eyes open ( $N=52$ ; green) for parametric and nonparametric analyses (left and right panel, respectively).
