# Supplementary material
Source: PubMed Central journal article supplement (PMC5510050)
Supplement: Supp_Fig5.pdf [file Supp_Fig5.pdf]

Parametric Analysis (GRF):  $Z \geq 3.1$

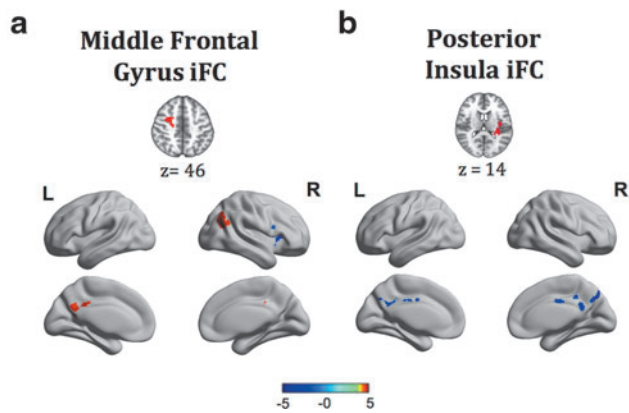

**SUPPLEMENTARY FIG. S5.** Surface maps show the iFC of the MFG (a) and PI (b) seeds related to EL in children with ASD surviving Gaussian Random field correction at  $Z \geq 3.1$ . Clusters whose iFC positively correlated with EL are shown in red, and those negatively correlated are shown in blue.
